# Supplementary material
Source: publisher figshare collection journal article supplement (https://acs.figshare.com/ndownloader/files/3874207)
Supplement: Supplementary file 1 [file 3874207]

Statistics for proteome:

To verify whether the used fixation method influences the detection of proteins we applied the chi-squared test, which allows us to look at the relationship between two nominal variables and determine whether they are independent of each other in the population. For each donor we determined a percentage of proteins identified only in HOPE, only in SF and then the intersection between both fixation methods (Table 1). The established null hypothesis was that the detection of proteins for each donor and the fixation method are independent at 0.05 significance level.

Table 1. Percentage of proteins identified in HOPE, SF and in both fixation methods

|                                  | <b>Donor 1</b> | <b>Donor 2</b> | <b>Donor 3</b> | <b>Donor 4</b> |
|----------------------------------|----------------|----------------|----------------|----------------|
| <b>HOPE</b>                      | 14.05660       | 11.90695       | 15.46001       | 14.37459       |
| <b>SF</b>                        | 28.36478       | 26.72176       | 27.47392       | 20.03929       |
| <b>HOPE <math>\cap</math> SF</b> | 57.57862       | 61.37129       | 57.06608       | 65.58612       |

The resulting P-value of the chi-squared test was calculated to be 0.8161.

Statistics for phosphoproteome:

To verify whether the used fixation method influences the detection of phosphopeptides for each donor we applied the same chi-squared test. For each donor we determined a percentage of phosphopeptides identified only in HOPE, only in SF and then the intersection between both fixation methods (Table 2). The established null hypothesis was that the detection of phosphopeptides for each donor and the fixation method are independent at 0.05 significance level.

Table 2. Percentage of phosphopeptides identified in HOPE, SF and in both fixation methods

|                                  | <b>Donor 1</b> | <b>Donor 2</b> | <b>Donor 3</b> | <b>Donor 4</b> |
|----------------------------------|----------------|----------------|----------------|----------------|
| <b>HOPE</b>                      | 21.91834       | 25.38541       | 23.60999       | 29.43793       |
| <b>SF</b>                        | 44.06780       | 42.30901       | 38.23529       | 27.41609       |
| <b>HOPE <math>\cap</math> SF</b> | 34.01387       | 32.30558       | 38.15471       | 43.14598       |

The resulting P-value of the chi-squared test was calculated to be 0.9408.
